# Supplementary material
Source: PubMed Central journal article supplement (PMC3091943)
Supplement: NIHMS286277-supplement-Suppl_S1.pdf [file NIHMS286277-supplement-Suppl_S1.pdf]

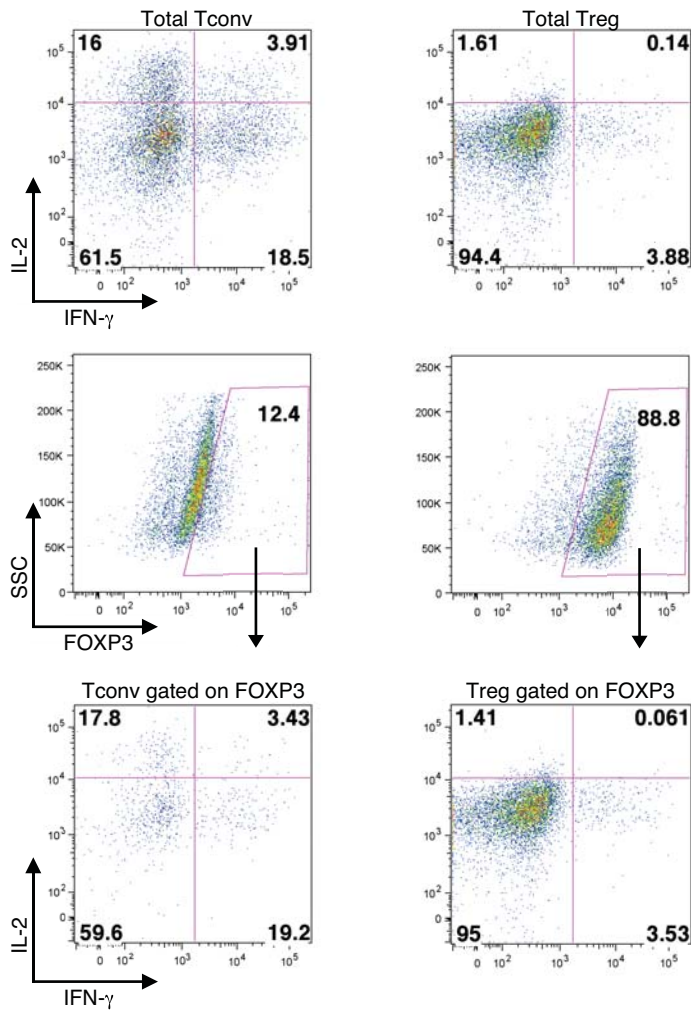

**Supplemental Figure 1. IFN- $\gamma$ <sup>+</sup> Tregs do not make IL-2.** Representative flow cytometric analysis of IL-2 and IFN- $\gamma$  following 14 d expansion and 4 h PMA/ionomycin stimulation (n = 3). Cytokine staining in total (top plots), or FOXP3<sup>+</sup> subset (bottom plots) of CD4<sup>+</sup>CD127<sup>hi</sup>-CD25<sup>+</sup> Tregs (right) or CD4<sup>+</sup>CD127<sup>+</sup>CD25<sup>-</sup> Tconv cells (left). Middle plots show gating of FOXP3<sup>+</sup> subset in each population. Numbers represent frequency of cells in each quadrant.

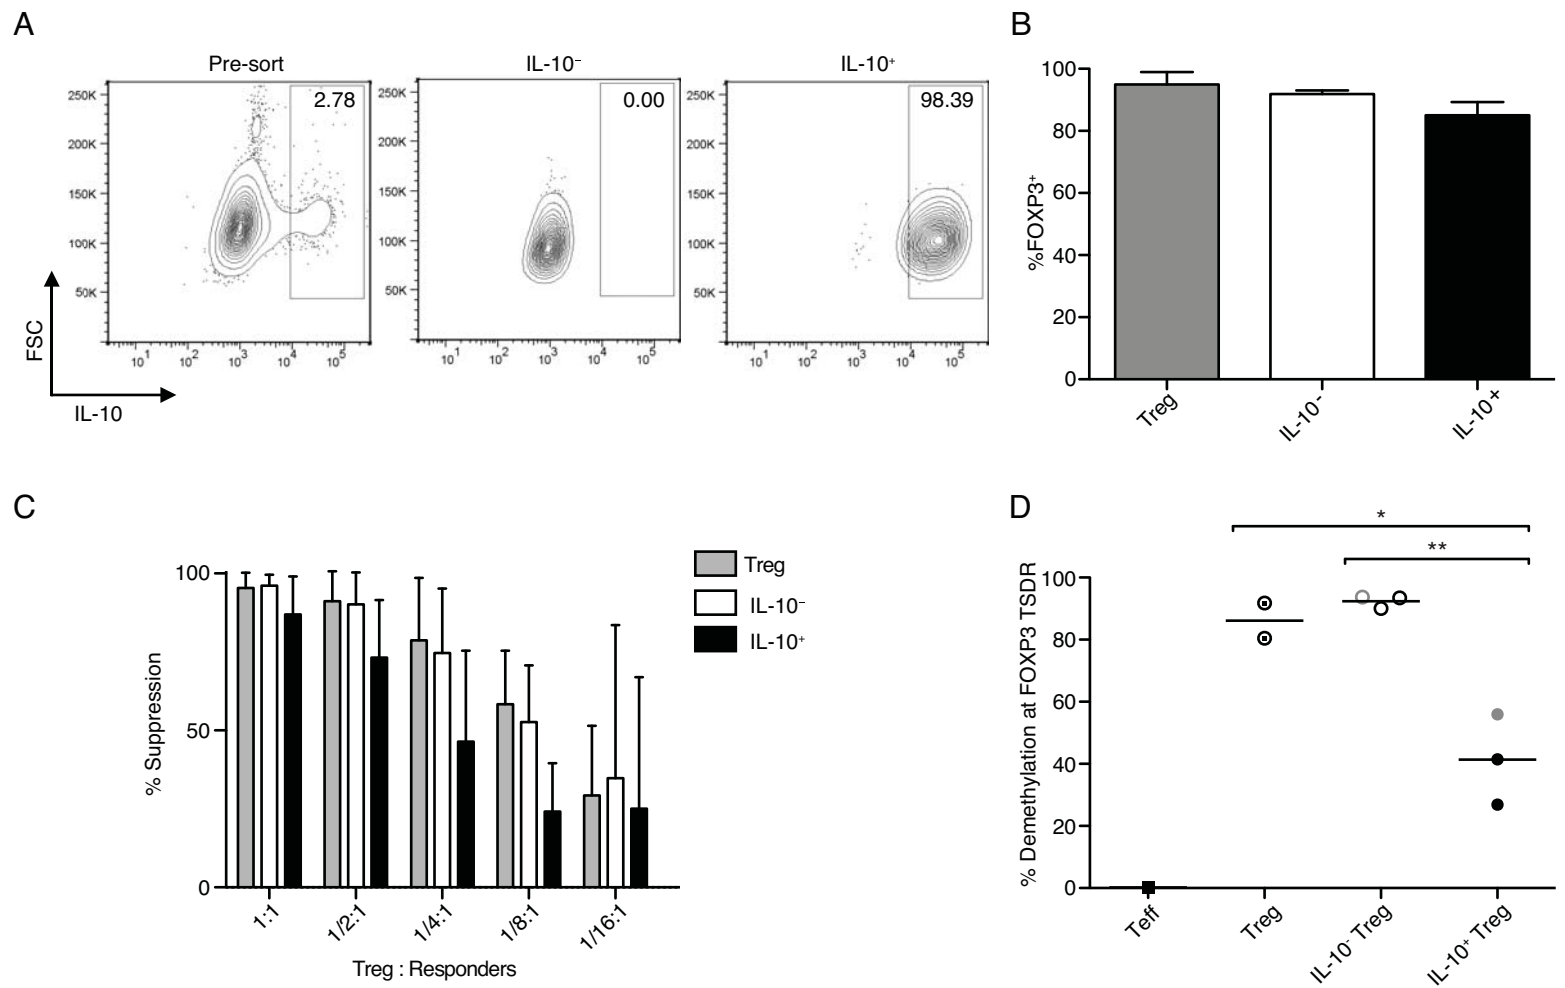

**Supplemental Figure 2. The IL-10<sup>+</sup> subset retains FOXP3 protein expression and suppressive function, but exhibits increased methylation at the FOXP3 TSDR.** A. Representative purities of populations before (left) and after cytokine capture and FACS-sorting of IL-10<sup>-</sup> (center) and IL-10<sup>+</sup> (right) cells from expanded CD4<sup>+</sup>CD127<sup>low</sup>CD25<sup>+</sup> Tregs. B. Percentage of expanded, PMA/ionomycin-stimulated cells expressing FOXP3, assessed by FACS. Shown are the mean + SD (n = 2). C. Percent suppression of T responder cell proliferation in vitro, as determined by incorporation of <sup>3</sup>H-thymidine. Shown are the mean + SD (n = 2). D. Percentage of cells demethylated at the FOXP3 Treg-specific demethylated region (TSDR). IL-10<sup>-</sup> and IL-10<sup>+</sup> subsets (open and closed circles, respectively) were isolated following stimulation with PMA/ionomycin and resorting either by IL-10 capture (black) or by fixation and intracellular FOXP3 and IL-10 staining (gray). Significance was determined by ANOVA. \*P<0.05, \*\*P<0.01.

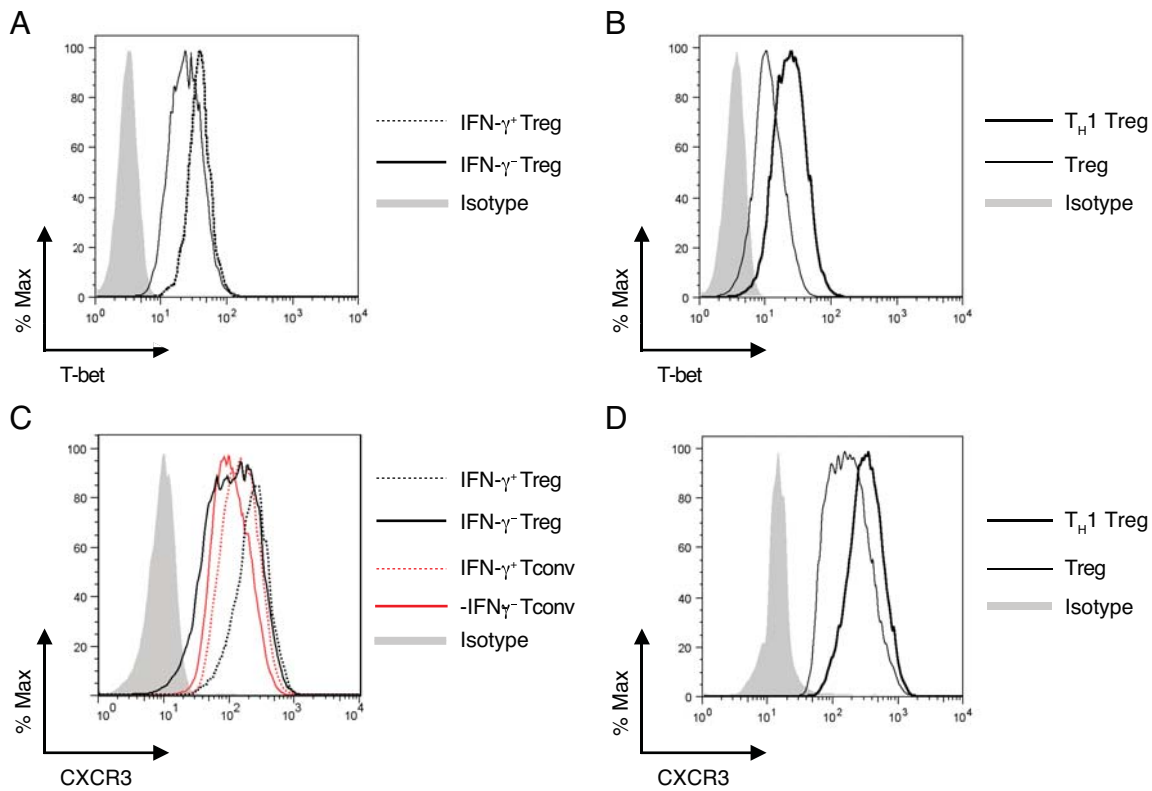

**Supplemental Figure 3. CXCR3 and T-bet are upregulated in  $T_H1$ -like Tregs.** *A, B*, Histograms show T-bet expression in  $CD4^+CD127^{lo/-}CD25^+CD45RA^+$  naïve Tregs after 8 days expansion, as assessed by FACS. Comparison of T-bet in *A*, Tregs gated as  $FOXP3^+IFN-\gamma^-$  (*solid*) or  $FOXP3^+IFN-\gamma^+$  (*dotted*) and *B*, in naïve Tregs cultured in neutral (*light*) or  $T_H1$ -skewing (*heavy*) conditions. *C*, CXCR3 expression following PMA/ionomycin stimulation in expanded  $CD4^+CD127^{lo/-}CD25^+$  Tregs (*black*) or  $CD4^+CD127^+CD25^-$  Tconv cells (*red*) gated on intracellular IFN- $\gamma$  expression, as assessed by FACS. *D*, Histogram shows CXCR3 expression in expanded  $CD4^+CD127^{lo/-}CD25^+CD45RA^+CD45RO^-$  naïve Tregs cultured in neutral (*light*) or  $T_H1$ -skewing (*heavy*) conditions.
